23

24 **Abstract**

25 *Staphylococcus haemolyticus* is one of the most important nosocomial human pathogens frequently  
26 isolated in bloodstream and medical devices related infections. This species is notorious for its multidrug  
27 resistance and genome plasticity. However, its mechanisms of evolution and adaptation are still poorly  
28 explored. In this study we aimed to characterize the strategies of genetic and phenotypic diversity in *S.*  
29 *haemolyticus*. Here, we analyzed an invasive *S. haemolyticus* strain, recovered from a bloodstream  
30 infection, for genetic and phenotypic stability after serial passage *in vitro* (>400 generations) in the  
31 absence and presence of sub-inhibitory concentrations of a beta-lactam antibiotic. We performed PFGE of  
32 the culture and five colonies at seven time points during stability assays were analyzed for beta-lactams  
33 susceptibility, hemolysis, mannitol fermentation and biofilm production. We compared their whole  
34 genome regarding chromosomal structure, gene content and mutations and performed phylogenetic  
35 analysis based on core SNPs. We observed a high instability in the PFGE profiles at the different time  
36 points during serial passage *in vitro* in the absence of antibiotic. However, no variation was observed in  
37 PFGE patterns in the presence of beta-lactams. Analysis of WGS data for individual colonies collected at  
38 different time points showed the occurrence of six large-scale genomic deletions within the *oriC* environ  
39 (36 kbp-348 kbp) in the cell populations analyzed, smaller deletions in non-*OriC* environ region as well  
40 as non-synonymous mutations in clinically relevant genes. The regions of deletion and point mutations  
41 included genes encoding amino acid and metal transporters, resistance to environmental stress and beta-  
42 lactams, virulence, mannitol fermentation, metabolic processes and IS elements. A parallel variation was  
43 additionally detected in clinically significant phenotypic traits such as mannitol fermentation, beta-  
44 lactams resistance, hemolysis and biofilm formation. All the genetic variants analyzed were closely  
45 related in their core genome (13-292 SNPs). Our results suggest that *S. haemolyticus* populations are  
46 composed of subpopulations of genetic and phenotypic variants that might be affected in antibiotic and  
47 stress resistance, specific metabolic processes and virulence. The maintenance of subpopulations in  
48 different physiological states might be a strategy to adapt rapidly to a stress situation imposed by the host  
49 particularly in the hospital environment.

## 50 **Introduction**

51 *Staphylococcus haemolyticus* is one of the most important nosocomial human pathogens frequently  
52 isolated in blood infections (including sepsis) related to implanted medical devices. It is easily  
53 distinguished from other coagulase-negative staphylococci (CoNS) by its multidrug resistant pattern, high  
54 numbers of antimicrobial resistance traits (Hira et al. 2013), formation of thick biofilms (Fredheim et al.  
55 2009) and high phenotypic variation and genome plasticity (Takeuchi et al. 2005).

56 Genetic diversity is believed to result from the very large number (as many as 82 IS, of which 60 were  
57 intact) of insertion sequences (IS) elements (Takeuchi et al. 2005), which is a number much higher than  
58 that found in *Staphylococcus epidermidis* ATCC 12228 (18 intact IS) and *Staphylococcus aureus* Mu50  
59 (13 intact IS). The large amount of IS elements is believed to contribute to its genome plasticity, through  
60 chromosomal rearrangements or deletions. However, the mechanisms of the evolution and adaptation of  
61 *S. haemolyticus* are still poorly understood.

62 Insertion sequences (IS) are transposable elements (less than 2.5 kb) that carry no genetic information  
63 except for transposases and short flanking terminal inverted repeats sequences (IR) (between 10 and 40  
64 bp), which serve as recognition sites for the transposase. This enzyme usually excises the IS and inserts it  
65 elsewhere in the genome (conservative transposition), but occasionally the IS replicates during the  
66 transposition process (replicative transposition) (Chandler and Mahillon 2002; Schneider and Lenski  
67 2004). By using mechanisms independent of large regions of DNA homology between the IS and target,  
68 these transposable elements are capable of repeated insertion at multiple sites within a genome. The  
69 impact of ISs in the overall genome architecture and gene expression can be very important, especially  
70 when present in multiple copies. These elements often cause gene inactivation (by direct integration into  
71 an open reading frame) and have strong polar effects, but can also lead to the activation (by providing the  
72 gene with a potent promoter) or alteration of the expression of adjacent genes (Zhang and Saier 2012). By  
73 changing the content of the genome, the IS elements might contribute to the innate ability of the bacteria  
74 to acquire drug resistance. Moreover, they can lead to complex chromosomal rearrangements that result in  
75 inversions or deletions, which can be very large and have impact on host adaptation (Watanabe et al.  
76 2007).

77 The impact of IS transposition on *S. haemolyticus* chromosomal rearrangements have been only explored  
78 in strain JCSC1435 which has 56 copies (40 intact) of IS1272 and ISShal. In this strain genomic  
79 rearrangements occurred preferentially near the origin of replication and implicated the deletion/inversion  
80 of large chromosomal fragments, which had impact on antibiotic resistance and sugar metabolism  
81 (Takeuchi et al. 2005). However, it is not known how frequently this phenomenon occurs within the  
82 population, if it is restricted to the *ori* region, if it also occurs at the cell population level, which factors  
83 might induce it and what are the consequences for the bacteria fitness and survival. The *oriC* environ is a  
84 chromosomal region of staphylococci reported to be important for the evolution of staphylococcal species  
85 and it is significantly larger in *S. haemolyticus* compared to that of *S. aureus* and *S. epidermidis*. For  
86 example, this region integrates the staphylococcal cassette chromosome, conferring resistance to virtually  
87 all beta-lactams (Ito et al. 2001).

88 Another possible origin of genetic diversity in *S. haemolyticus* that can or not be related to IS is the high  
89 recombination rate described based on the examination of the sequence changes at MLST loci during  
90 clonal diversification (Bouchami et al. 2016). In particular, the per-allele and per-site recombination to  
91 mutation (r/m) rates reported for this species were 1:1 and 2.9:1, respectively (Bouchami et al. 2016).

92 The few studies available analyzing the population structure of nosocomial *S. haemolyticus* showed that  
93 they are genetically diverse by pulsed-field gel electrophoresis (PFGE); but belong to two main clonal  
94 lineages as concluded by multilocus sequence typing (MLST) (Bouchami et al. 2016; Cavanagh et al.  
95 2012) and whole genome sequencing analysis (Pain et al. 2019).

96 In spite of the extremely high number of ISs in *S. haemolyticus* and the high recombination rate, the  
97 impact of transposition and recombination in genome architecture, population structure, and pathogenicity  
98 of *S. haemolyticus* was limitedly explored only. This study showed that chromosomal and phenotypic  
99 diversity in *S. haemolyticus* frequently occurs within a cell population, revealing a new mechanism of the  
100 evolution and adaptation of this species.

101

102

103

## 104 **Results**

### 105 ***S. haemolyticus* invasive strain has a high genomic instability in the absence of environmental stress**

106 In our previous study (Bouchami et al. 2016), we observed a high instability in SmaI PFGE  
107 macrorestriction patterns during serial passage *in vitro* in optimal growth conditions of the invasive *S.*  
108 *haemolyticus* strain HSM742. A culture originated from a single colony was the starting point of the  
109 stability assay that was performed along 34 days. The growth rate of HSM742 strain was  $0.33 \text{ h}^{-1}$ , which  
110 corresponds to a duplication time of 2 h, indicating that after 34 days of serial growth *in vitro*, 408  
111 generations have occurred. During this period, the SmaI PFGE patterns changed several times in two or  
112 more bands and in some occasions reverted to the original genotype. The PFGE patterns  
113 of *S. haemolyticus* strain HSM742 from days 4, 7, 10, 19 and 31 remained unchanged after passage  
114 (results shown in previous study; Supplemental Fig. S1) comparing to day 0. However, PFGE patterns  
115 obtained from days 13, 16, 22, 25 and 28 were distinguishable from those of the original (first) strain. We  
116 noticed that the banding pattern of strains isolated in days 13, 25 and 28 varied at three loci; one with a  
117 new band (approximate molecular weight 358 Kb) and two with missing bands (approximate molecular  
118 weights 432 and 74 Kb). The PFGE patterns of strains isolated in days 16 and 22 lost, each, one band  
119 (approximately 74-Kb and 108 Kb, respectively) and gained an additional band (432 Kb and 159 Kb,  
120 respectively).

121 The repetition of the stability assay in the exact same conditions and from the same original culture, but in  
122 the presence of oxacillin, showed completely different results. In particular, we found changes in PFGE  
123 patterns only at day 22. In this case, the strain of day 22 lost one band of, approximately, 159 Kb, and  
124 gained one band with 108 Kb. Additionally, the PFGE profile of the parental strain d0 in presence of  
125 oxacillin was different from that in absence of oxacillin. Interestingly, however, this PFGE pattern was  
126 similar to one of the PFGE pattern variants found in the stability assay performed in the absence of  
127 antibiotic (d22, variant V1 or V2; Supplemental Fig. S1). Results suggest that in the absence of an  
128 environmental stress there are diverse subpopulations of genomic variants in the same cell culture.  
129 However, in the presence of an environmental stress, like sub-inhibitory concentrations of antibiotic, or  
130 nutrients limitation, the most adapted subpopulation will be selected.

131

132 **Genomic variants of *S. haemolyticus* invasive strain have deletions within and outside *oriC* environ**

133 To test this hypothesis and understand the mechanisms explaining the existence of subpopulations of  
134 genomic variants in the absence of antibiotic, we selected the seven time points, in which we observed an  
135 alteration in the PFGE patterns, to study in more detail (days 0, 13, 16, 22, 25 and 28). The culture from  
136 each of these days was plated in rich medium and five colonies on each plate were randomly picked for  
137 DNA extraction and analysis of whole genome. Draft genomes of the 35 colonies were reconstructed by  
138 *de novo* assembly followed by alignment, using Mauve (Darling et al. 2010) and the reference strain with  
139 a closed genome JCSC1435 (Takeuchi et al. 2005). Draft genomes were then aligned and visualized using  
140 the BLAST Ring Image Generator (BRIG). A visual inspection of the circular alignment of the genomes  
141 of HSM742 (Fig. 1A) revealed a relatively high similarity of the draft genomes with the reference  
142 genome (90-100%), suggesting that almost all the genome of the reference strain was covered by the  
143 Illumina sequencing performed for the 35 colonies. Also, alignment of JCSC1435 with the closed genome  
144 obtained for HSM472 strain in day 0 by Nanopore showed that the two strains were highly homologous  
145 (92% identity) and have similar chromosomal structures, suggesting JCSC1435 is an appropriate  
146 reference to use in the alignment.

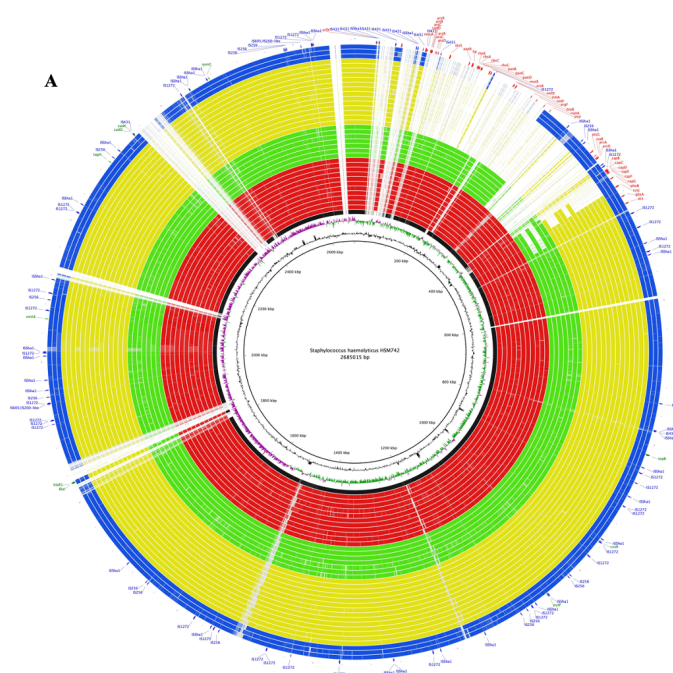

147

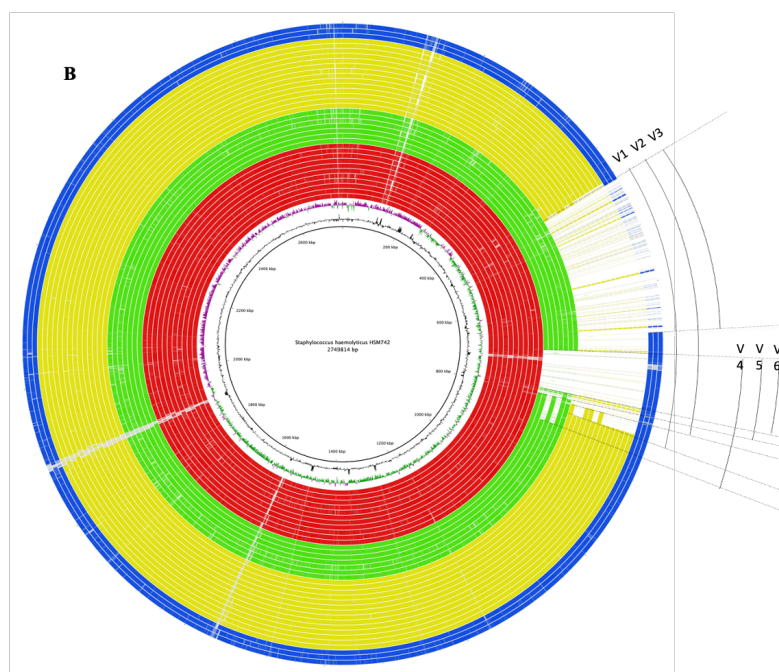

148

149

150 **Figure 1.**

151 (A) Whole genome sequence analysis and comparison of JCSC1435 with other *S. haemolyticus* HSM742 strains.

152 BRIG circular diagram of the HSM742 chromosome showing (from inner to outer), the homology based on

153 BLASTn+ analysis of *S. haemolyticus* JCSC1435 reference genome to 35 completed HSM742 genomes (24

154 mannitol negative strains and 11 mannitol positive strains) (refer color-coded legend). The innermost circles

155 represent the GC content (black), GC skew (purple/green). The outer rings show shared identity (according to

156 BLASTn) with individual HSM742 genomes and JCSC1435 genome. BLASTn matches between 70% and 100%

157 nucleotide identity are colored from lightest to darkest shade, respectively. Matches with less than 70% identity, or

158 JCSC1435 regions with no BLAST matches, appear as blank spaces in each ring. Colored circles arranged from

159 inner to outer as follow: JCSC1435 (black); Sh29/312/L2 (black); d0C1-d0C5, d13C1-C2, d16C1-C2, d28C1,

160 d34C1 (red); d13C3 (V5), d16C3 (V5), d16C5 (V4), d25C1 (V5), d25C2 (V4), d28C2 (V6), d34C4 (V5); d13C4

161 (V2) (green); d13C5 (V1), d16C4 (V1), d22C1-C2, d22C3 (V1), d22C4 (V2), d22C5 (V1), d25C3-C5 (V1), d28C3-

162 C5 (V1) (yellow); d34C2-C3 (V3), d34C5 (V3) (blue). Outer circle shows the location of the insertion sequences

163 (blue labels and arcs) and regions of difference (deleted regions) (red labels and arcs) not present in mannitol

164 negative strains, deleted genes outside the *oriC* (green). The image was prepared using Blast Ring Image Generator

165 (<http://sourceforge.net/projects/brig>). doi:10.1371/journal.pone.0026578.g001. (B) Whole genome sequence analysis

166 and comparison of the closed genome of HSM742d0 with other *S. haemolyticus* HSM742 strains. BRIG circular

167 diagram of the HSM742 chromosome showing (from inner to outer), the homology based on BLASTn+ analysis of  
168 the closed genome of HSM742d0 to 35 completed HSM742 genomes (24 mannitol negative strains and 11 mannitol  
169 positive strains) (refer color-coded legend). The innermost circles represent the GC content (black), GC skew  
170 (purple/green). The outer rings show shared identity (according to BLASTn) with individual HSM742 genomes and  
171 d0C1 (sequenced by Nanopore). BLASTn matches between 70% and 100% nucleotide identity are colored from  
172 lightest to darkest shade, respectively. Matches with less than 70% identity, or d0C1 regions with no BLAST  
173 matches, appear as blank spaces in each ring. Colored circles arranged from inner to outer as follow: JCSC1435  
174 (black); Sh29/312/L2 (black); d0C1-d0C5, d13C1-C2, d16C1-C2, d28C1, d34C1 (red); d13C3 (V5), d16C3 (V5),  
175 d16C5 (V4), d25C1 (V5), d25C2 (V4), d28C2 (V6), d34C4 (V5); d13C4 (V2) (green); d13C5 (V1), d16C4 (V1),  
176 d22C1-C2, d22C3 (V1), d22C4 (V2), d22C5 (V1), d25C3-C5 (V1), d28C3-C5 (V1) (yellow); d34C2-C3 (V3),  
177 d34C5 (V3) (blue). The image was prepared using Blast Ring Image Generator (<http://sourceforge.net/projects/brig>).  
178 doi:10.1371/journal.pone.0026578.g001.

179

180 The genome of the great majority of colonies (obtained from up to 34 days of serial growth and >400  
181 generations) were highly identical in core nucleotide sequence, as shown by the small number of SNPs  
182 found (2-193 SNPs, excluding mutators) when strains were compared by core SNPs analysis (Fig. 2;  
183 Supplemental Table S1; Supplemental Fig. S2). However, six different structural genomic variants (V1-  
184 V6) were observed, when colonies' *de novo* assembled contigs were aligned against the closed genomes  
185 of *S. haemolyticus* JCSC1435 and the HSM472-d0C1 (corresponding to a colony collected in day 1)  
186 using BRIG, or their reads mapped against the JCSC1435 strain (Fig. 1A, B). Genomic variants included  
187 deletions of different fragments sizes (313 Kb, 294 Kb, 179 Kb, 131 Kb, 82 Kb and 74 Kb), all located in  
188 the *oriC* environ right to the origin of replication between nucleotide 36000 bp and 349000 bp. Five  
189 colonies did not suffer any deletion in the *oriC* when compared to HSM742 d0C1.

190

191



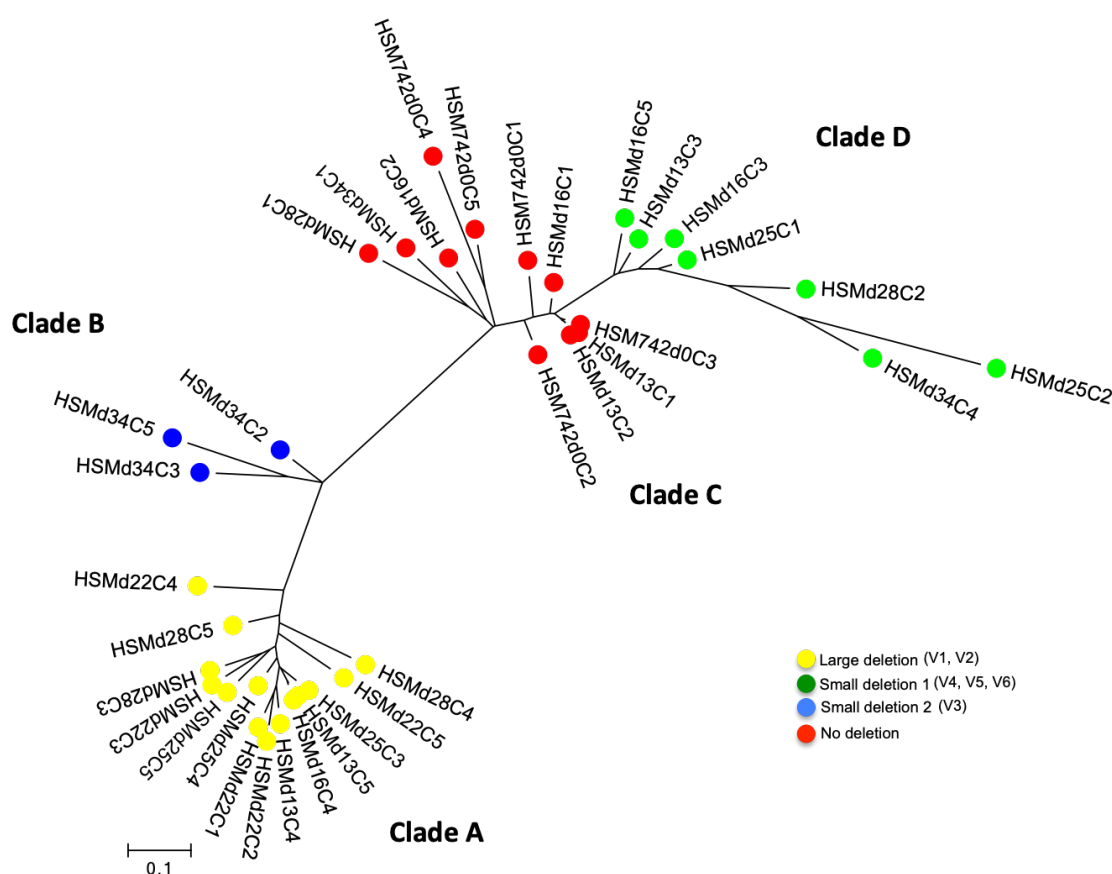

192

193 **Figure 2.** Phylogenetic RaxML tree based on 5,551 core SNPs excluding recombination, found among 35 colonies  
 194 obtained from different time points in the stability assay of *S. haemolyticus* strain HSM472, using as reference the  
 195 genome of JCSC1435 strain. Each node represents a strain (1 colony); nodes with identical color belong to the same  
 196 cluster.

197

198 To understand which genes were contained within these regions, we constructed the pangenome of the 35  
 199 colonies and the presence/absence of genes was recorded using ROARY software. The largest deletion of  
 200 313 Kb, accounted for the loss of as many as 310 genes (Supplemental Table S2) (V1), when compared to  
 201 d0C1. This deletion event was observed in 10 colonies of the stability assays in (d13C5; d16C4; d22C3;  
 202 d22C5; d25C3-C5; d28C3-C5) and occurred between MaoC domain-containing protein dehydratase  
 203 (36Kb) and Phosphoadenosine phosphosulfate reductase (CysH) (349 Kb). Another large fragment  
 204 deletion of a similar size (294 Kb) and spanning the same chromosomal region, with the exception of the  
 205 last 23bp, was also observed (V2) in four colonies (d13C4; d22C1-C2; d22C4).

206 There were no insertion sequences (IS) in the vicinity of the extremities of these fragments, however  
207 *IS1272*, *IS431* and *ISSha2* were part of the deletion fragment in all the 14 colonies (Supplemental Table  
208 S2). We also identified smaller deletions of 179 Kb (V3) within the same chromosomal region in three  
209 colonies (d34C2-C3; d34C5) wherein 186 genes were lost in the *oriC* environ. The upstream deletion  
210 point coincided with that of variants V1 and V2, but the downstream deletion point in these colonies was  
211 in the end of gene ABC transporter ATP-binding protein (215 Kb), instead.

212 The remaining three variants (V4, V5, and V6) corresponded to minor fragment deletions sizes (of 131,  
213 82 and 74 Kb, respectively) and were detected in seven colonies (V4: d16C5, d25C2; V5: d13C3, d16C3,  
214 d25C1, d34C4; V6: d28C2). In these variants between 71, 78 and 123 genes were deleted when  
215 comparing to d0C1, and *IS1272* was located in the upstream extremity of the deletion region in 5/7  
216 isolates. These very small deletions occurred between the MFS family major facilitator transporter,  
217 chloramphenicol:cation symporter (located 244 Kb downstream the *oriC*) and a hypothetical protein (at  
218 375 Kb, V4), a capsular polysaccharide biosynthesis protein Cap5G (located at 326 Kb, V5), or a FMN-  
219 dependent NADH-azoreductase, AzoR protein (at 318 Kb, V6).

220 We identified yet another source of variation, outside the *oriC* environ in different regions of the  
221 chromosome, wherein small deletions were also observed (Supplemental Table S3). In the 35 colonies  
222 analyzed between 71 and 313 genes were deleted outside the *oriC*, which corresponds to 16% of the total  
223 number of genes initially present in d0C1 (predicted number 1893). We could not observe a direct  
224 correlation between the gene deletions occurring outside the *oriC* environ and those occurring within the  
225 *oriC* environ, suggesting the two events are independent.

226

### 227 **Genomic variants of *S. haemolyticus* invasive strain are highly related**

228 To confirm the relatedness of the 35 colonies analyzed we performed a SNPs analysis of the draft  
229 genomes obtained for each strain. The percentage of the reference genome JCSC1435 that is covered by  
230 all isolates was 65.98% implying that 1 771 593 positions from the reference were found in all analyzed  
231 genomes. A total of 5551 qualified core SNPs without recombination events was used to construct a ML  
232 phylogenetic tree (Fig. 2).

233 The great majority of 35 colonies differed between them in a small number of core SNPs (1-295 SNPs)  
234 (Fig. 2) (estimated medium short term mutation rate of  $3.7 \times 10^{-4}$  substitutions per site per year) when  
235 compared with the number of SNPs obtained when each colony was aligned to a completely distinct *S.*  
236 *haemolyticus* strain (JCSC1435, >5300 SNPs). The only exceptions were d0C5 and d25C2 that were  
237 more distantly related to the remaining colonies (370-1127 SNPs; 995-1127 SNPs, respectively) and  
238 might correspond to mutator genotypes. A detailed analysis of the SNPs of d25C2 (V4) and d0C5 (no  
239 deletion) confirmed the existence of several non-synonymous substitutions, when compared to other  
240 colonies, in genes involved in DNA repair function and previously associated to mutator phenotypes  
241 (Prunier and Leclercq 2005; Sinha et al. 2020). In d25C2 colony these included mutations in *mutL* (1 SNP  
242 difference with 32 variants and several SNPs with 2 variants), *recD* (1-4 SNPs with all the variants), and  
243 *recN* (1 SNP with d0C4 only). Moreover, in d0C5 colony, mutations in *mutL* (several SNPs with d34C1-  
244 C3-C4), *recO* (several SNPs with d34C4 only) and *recU* (1 SNP with d28C2 only) were additionally  
245 found.

246 The phylogenetic reconstruction based on core SNPs analysis grouped the 35 *S. haemolyticus* strains into  
247 four clades (A-D) (Fig. 2). The distribution of the six genomic variants coincided exactly with the  
248 phylogenetic distribution. In particular, we observed that all the colonies with large-scale deletions,  
249 including V1 and V2 variants, were grouped in the same genomic cluster A (1-52 SNPs); colonies with  
250 small deletions, including variant V3 was grouped in clade B (61-167 SNPs); and strains including the  
251 variants V4-V6 were grouped in clade D (1-144 SNPs)]. While strains without deletions were clustered  
252 together in clade C (2-193 SNPs).

253 We also noticed that each cluster of related genomes included colonies isolated in different days of the  
254 stability assay. For example, in cluster A we found highly related colonies isolated in days 13, 16, 22, 25  
255 and 28; and in cluster C we found highly related colonies isolated in days 0, 13, 16, 28, and 34. On the  
256 other hand, we also observed that at day0, all the colonies tested had no deletions, belonging all to clade  
257 C, while in day 13, three colonies were deletion variants, belonging to clades A, B, and D. The proportion  
258 of the different genomic variants actually seems to vary along time. While after just a few generations  
259 (day 0) the non-deleted genome appears to predominate, in day 22 (275 generations) the large deletion

260 variants (V1 and V2) prevailed. This change in proportion was further confirmed by testing a higher  
261 number of colonies (n=20) from each day of culture, using as a surrogate marker of the deletion event the  
262 presence/absence of mannitol fermentation (Supplemental Fig. S3; see results below). This is based on  
263 the fact that large deletions include the loss of the mannitol fermentation operon, observed by annotation  
264 of the deleted fragments. Another observation that sustains this finding is the fact that in some PFGE  
265 patterns faint bands were detected in certain time points that then become stronger in a later time point  
266 and vice versa (Supplementary Fig. S1).

267 Altogether, results suggest that deletion variants were already present in the starting culture (d0), or  
268 emerged in early generations, although in a low prevalence. Deletion events should have occurred a  
269 limited number of times in the population and were then maintained in the subsequent generations,  
270 evolving afterwards mainly through mutations. However, the proportion of the different deletion variants  
271 appears to have varied overtime (Fig. 2).

272

### 273 **Estimation of the proportion of deletion variants in the population**

274 To establish the proportions of the variants at each time point, we took advantage of the fact that colony-  
275 variants suffering large deletions (V1, V2 and V3) had lost the mannitol operon, missing the ability to  
276 ferment mannitol, while colonies without deletions (ND) or with small deletions (V4, V5 and V6), were  
277 still able to metabolize this sugar. Actually, a total association could be observed for the five colonies  
278 tested at each time point regarding the type of variant, the presence/absence of mannitol operon (*mtlA*,  
279 *mtlD* and *mtlF* genes) and the corresponding ability to ferment mannitol. To increase the number of  
280 colonies analyzed and distinguish between these two types of variants at each time point, the daily  
281 cultures analyzed in this study were plated and 20 colonies picked and tested for mannitol fermentation in  
282 microtiter plates (Supplemental Fig. S3). We found that the proportion of mannitol fermenters and non-  
283 fermenters varied over time. We found that among the 20 colonies tested the proportion of mannitol  
284 negative strains was the following: day 0, 0/20; day 13 1/20; day 16, 1/20; day 22, 15/20; day 25, 18/20;  
285 day 28, 13/20; and day 34, 17/20.

286

287

## 288 **Biological functions lost through deletion events in genomic variants**

289 As summarized in Figure 3 and in Supplemental Table S2, up to 310 genes were deleted from the largest  
290 deletion (V1) and all the other deletion variants suffered smaller deletions within this same region (V2,  
291 V3-V6) or in a region 131 Kb upstream (V4). Among the deleted genes a high proportion of genes (n=  
292 238) encoded for hypothetical proteins. A function could be attributed for 72 genes only. These included  
293 for example genes encoding: metal transport systems and metal binding (arsenic, copper, chromium and  
294 cadmium) (*arsB*, *copA*, *chrA* and *cadD*); transcriptional regulators (*arsR*, *asnC*, *cynR*, *lysR*); amino acid  
295 transporters (D-serine/D-alanine/glycine transporter *aapA* gene); virulence-related genes (*isaB*, *lip*,  
296 *capABCDEFG*, *splE*, cell wall anchored surface proteins); sugar transport and metabolism, namely for  
297 mannitol (*mtlA*, *mtlD* and *mtlF*), glucose/maltose/N-acetylglucosamine (*ptsG*), and ribose (*rbsABCK*);  
298 metabolism of carbohydrates (*nanA*); mismatch repair (*mutS*); and restriction/modification systems  
299 (Modification methylase DpnIIA: *DpnM* gene; NgoFVII family restriction endonuclease).

300 Among the 35 colonies, besides the occurrence of the large deletion in the *oriC* environ, we observed the  
301 deletion of as many as 122 additional genes outside this region, among the 35 colonies. A total of 276  
302 genes encoding for hypothetical proteins was detected. The 122 genes with known functions included  
303 genes coding for or involved in: insertion sequences including *IS1272*, *IS431* and *ISSau3*; phages  
304 (prophages); metal and peptide transport (*tagH*, *potB*, *oppD*, *fmt*, *mnhE*, *vraG*, *copA*); metal binding  
305 (*csor*, *sprT*); translation machinery (*rplU*, *rpmI*, transfer RNAs); DNA replication (*dnaE*, *repC*);  
306 virulence, growth and survival (T-box, *rli60* and *putP*); methicillin and penicillin resistance (*blaR1*, *blaI*);  
307 quorum sensing and regulation of virulence (*agrC*); biofilm production (*traP*, *fnb*, *cadX*, *cadD*, *rli60*);  
308 response to osmotic and oxidative stress and acidic pH (ncRNA *RsaA*, *RsaH*) and cold shock (ncRNA  
309 *RsaD*); cell viability (*sipB*).

310 The different deletion variants lost different functions when compared to the genome of non-deleted  
311 colonies (d0C1). For example, V3 colonies lost the ribose transporter and V4, V5 and V6 colonies lost the  
312 immunodominant antigen B (*isaB*). However, the maintenance of several different deletion variants in the

313 same cell population (Fig. 3A, B; Supplemental Table S2), guarantees that the entire gene pool is almost  
314 always present in the population.

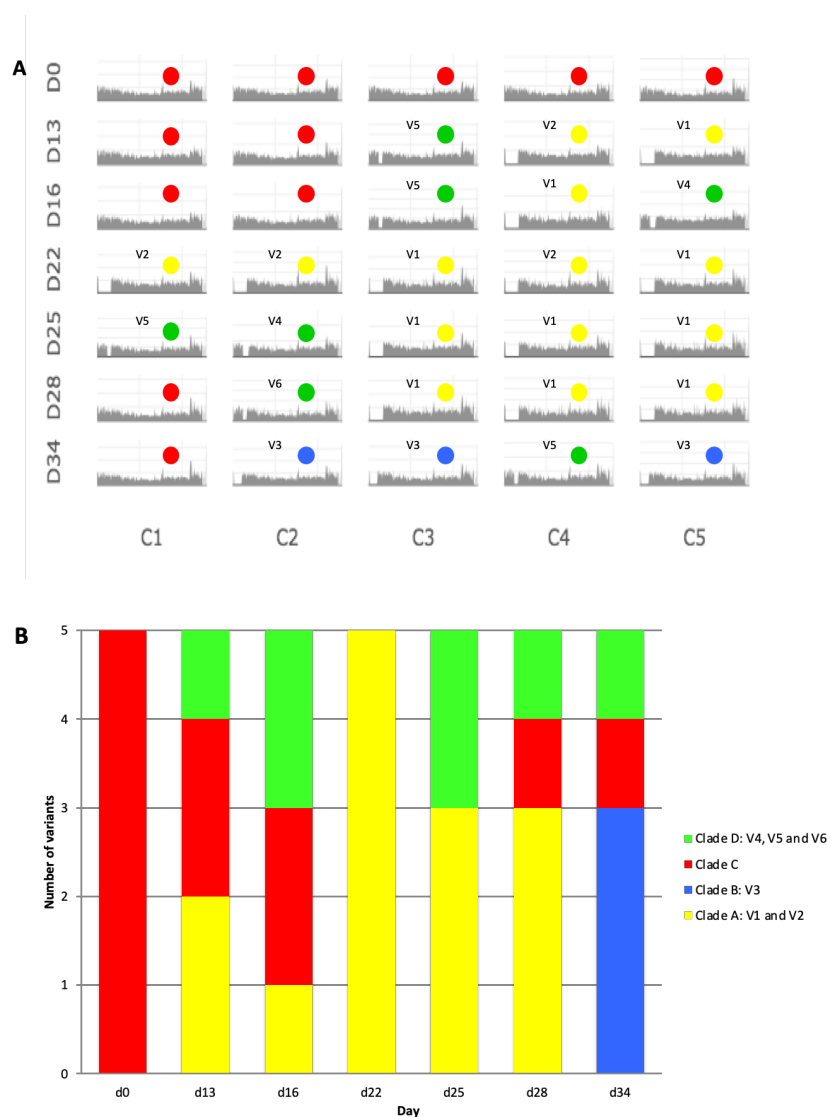

315

316

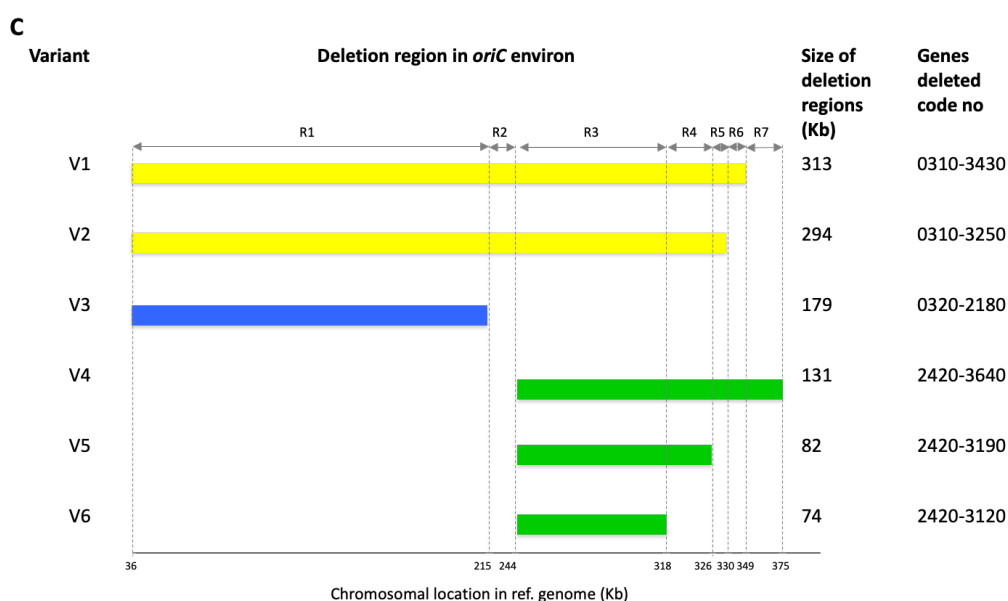

317

318 **Figure 3.** (A) Reads mapping of strain HSM742 against the reference strain *Staphylococcus haemolyticus*  
 319 Sh29/312/L2. In xx axis nucleotides are in the order of the nucleotides in the reference starting from the *oriC*. In the  
 320 yy axis is the coverage for each nucleotide position. D indicates days of passage *in vitro*. C indicates colonies. V1-  
 321 V6 indicate the deletion variants and colors represent the phylogenetic clades to which the colonies belong to  
 322 according to SNPs analysis; clade A – yellow; clade B – blue; clade C – red; clade D – green. (B) Distribution of  
 323 deletion variants of strain HSM742 in seven time points of the stability assay. Different colors indicate the clades to  
 324 which the variants belong to, according to the phylogenetic tree constructed based on the SNPs analysis. (C)  
 325 Chromosomal localization and distribution of deleted genomic regions in variants of strain. Color coding has been  
 326 used for visualizing the clades to which the variants belong to, according to SNPs analysis. Size of deletions are  
 327 shown for each variant in kilobase (kb).

328

### 329 **Phenotypic variation was observed during deletion events in genomic variants**

330 To evaluate the impact of the genomic deletion events in clinically relevant phenotypes, the same 35  
 331 colonies that were used to extract DNA for WGS were used to test for mannitol fermentation, oxacillin  
 332 and cefoxitin resistance level, biofilm formation and hemolysis.

333 Different oxacillin and cefoxitin MICs were found from colony to colony, varying from 32-256  $\mu\text{g/ml}$   
 334 and 12 to  $>256 \mu\text{g/ml}$ , respectively. Additionally, we observed the existence of both mannitol fermenting  
 335 and non-fermenting, hemolytic and non-hemolytic and biofilm producer and non-producer among the 35

336 colonies. Moreover, a difference in phenotypes was observed between colonies isolated from the same  
 337 time point, namely in cefoxitin MICs, mannitol fermentation, hemolysis and biofilm production (Table 1).  
 338 This is the case of colonies collected in days 13, 16, 25, 28 and 34 that yielded both mannitol-positive and  
 339 mannitol-negative results. On the other hand, the same phenotypes were found in different days of  
 340 growth. For example, the cefoxitin MIC of 64  $\mu\text{g}/\text{ml}$  was observed in 10 colonies collected in different  
 341 days including d13C3, d13C4, d16C4, d16C5, d25C4, d25C5, d28C3-5 and d34C4.

342

343

344

345

346 **Table 1.** Colony to colony phenotypic variation of *S. haemolyticus* strain HSM72 after 34 days of serial growth *in*  
 347 *vitro*. Alterations in phenotypes are shown as a gray scale

348

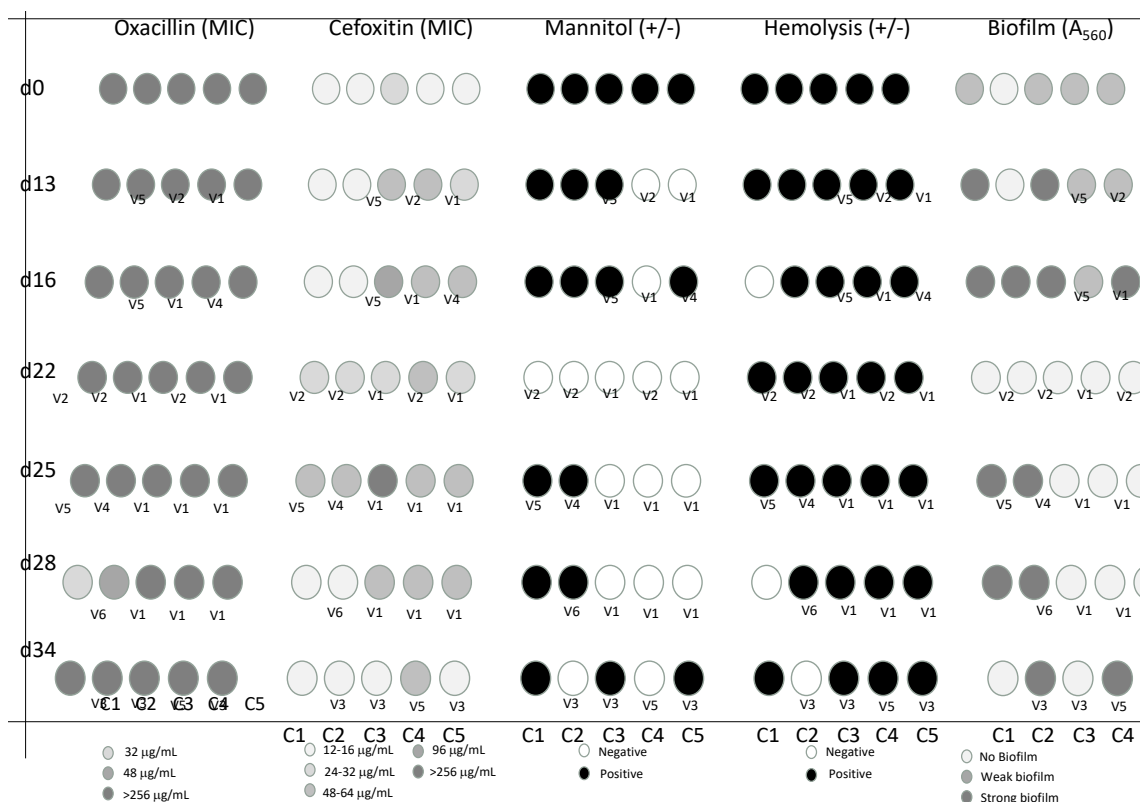

349

350

351



## 352 **Establishment of association between phenotypic and genotypic changes**

353 In order to identify potential links between phenotypic changes observed and the deletions events  
354 occurring in the *oriC* environ, described in the different colonies, we used a targeted approach in which  
355 we compared phenotypes obtained for each feature tested with the type of deletion variants found for each  
356 colony (V1-V6) and looked for genes potentially associated to the phenotype within the deletion region.  
357 Additionally, to understand if genes deleted in the region outside the *oriC* environ could be implicated in  
358 the emergence of phenotypic variants, we performed an untargeted association analysis. For this purpose,  
359 the pangenome of the 35 colonies was constructed using ROARY software and the presence/absence of  
360 genes was analyzed. Besides, we also searched for the occurrence of non-synonymous SNPs in genes  
361 potentially associated to the phenotypes tested.

362 All deletion variants, except V3 and V6, were associated to an increase in cefoxitin MIC, when compared  
363 to the colonies without deletions. The results suggest that genes included in the region of deletion that is  
364 common to V1, V2, V4, V5 but that is present in V3, V6 and non-deleted colonies (regions R2 and R4 in  
365 Figure 3C), should be important for this change in phenotype. Among all genes contained within R2 and  
366 R4 regions, those whose functions have been previously associated to beta-lactam resistance regards to  
367 genes (*opuD*) encoding transport systems for osmolytes, such as choline/carnithine/betaine. These  
368 mechanisms were previously described to be upregulated and associated to increased susceptibility to  
369 beta-lactams (decrease in MIC) in *femAB* mutants in *S. aureus* and were found to be upregulated in  
370 methicillin resistant *S. aureus* (MRSA) heterogenous phenotype when compared to a homogenous  
371 phenotype (Keaton et al. 2013; Beenken et al. 2004; Hübscher et al. 2007).

372 We also observed that the variant V6 had an oxacillin MIC=48 ug/mL, while all the other deletion  
373 variants as well as non-deleted colony had a MIC>256 ug/mL, but in this case no region of deletion is  
374 specific of V6 only, and no genes were only found present in this variant only, as deduced from the  
375 presence/absence analysis. Analysis of SNPs of the variant V6 (d28C2) showed mutations in *recU* gene  
376 (1 SNP difference with all the variants; nonsynonymous substitution) and in *femB* gene (1 SNP difference  
377 with d0C5 and d25C2 (V4); nonsynonymous substitution) suggesting that the phenotype alteration could

378 be associated to mutations in these genes, described previously to be involved in oxacillin resistance  
379 (Table 1).

380 There was also an almost perfect correlation between the loss of mannitol fermentation ability and the  
381 deletion variants V1, V2 and V3. Although the deletion of the region that is common to these three  
382 variants (R1 region) contains as many as 188 genes, the loss of mannitol fermentation ability is most  
383 probably explained by the deletion of the *mlt* operon, contained within this R1 region.

384 Regarding biofilm phenotype the association between the phenotype and genotype appears to be more  
385 complex. While all the V1 and V2 colonies showed decreased biofilm formation when compared to the  
386 non-deleted colonies, in V4, V5 and V6 colonies biofilm production was increased, and V3 showed  
387 variable results. The genes associated to the decrease in biofilm may be within the deletion region that is  
388 specific of V1 and V2 only (R2 region in Table 2 and Figure 3C). Among the few annotated genes in this  
389 region, those encoding for oligopeptide transport were previously found to be upregulated in biofilm  
390 when compared to planktonic growth in *S. aureus* (Beenken et al. 2004; Graf et al. 2019) and might be  
391 also responsible for the decrease in biofilm when deleted in variants V1 and V2. The genes associated to  
392 an increase in biofilm formation should be associated to a deletion region that was common and specific  
393 of V4, V5 and V6 or to genes that are specifically found in these variants and not found in V1 and V2 or  
394 in the non-deleted colonies, but according to the deletion chromosomal locations, this is an impossibility.  
395 It is thus conceivable that the strong biofilm phenotype might be due to mutations occurring in regions of  
396 the chromosome different from *oriC* environ or new regulatory mechanisms induced by the deletion  
397 event. Analysis of SNPs showed mutations in *cadD* and *arsC* genes (nonsynonymous substitutions) in  
398 strong biofilms producers comparing to biofilm weak producers or non-producers suggesting that the  
399 phenotype alteration could alternatively be due to mutation in these genes that have been previously  
400 shown to be involved to biofilm formation (Gill et al. 2005; Zhou et al. 2020; Vernyik et al. 2020; Wu et  
401 al. 2015). Regarding hemolysis no clear alteration in phenotype was observed and the small variations in  
402 the hemolysis halo observed were not correlated with any particular deletion variant, gene or mutation.

403

404

405 **Table 2.** Deletion regions and genetic determinants putatively involved in phenotype alteration in *Staphylococcus*  
 406 *haemolyticus* HSM72 strain variants

| Phenotype altered     | Deletion region | Variants       | No. of Genes | Genes with attributed function putatively involved in phenotype alteration    | Function                                                                                                                                                | Genetic events                            | Reference                                                                     |
|-----------------------|-----------------|----------------|--------------|-------------------------------------------------------------------------------|---------------------------------------------------------------------------------------------------------------------------------------------------------|-------------------------------------------|-------------------------------------------------------------------------------|
| Mannitol fermentation | R1              | V1, V2, V3     | 188          | mlt operon                                                                    | Oxidoreductase,<br>Mannitol-1-phosphate 5-dehydrogenase activity,<br>Phosphotransferase,<br>Mannitol metabolism pathway                                 | Deletion                                  | Takeuchi et al. 2005                                                          |
| Cefoxitin resistance  | R2              | V1, V2         | 24           | Oligopeptide ABC superfamily ATP binding cassette transporter binding protein | ATPase activity,<br>ATP binding,<br>Transport,<br>Beta-lactam resistance                                                                                | Deletion                                  | Wu et al. 2015<br>Gill et al. 2005<br>Zhou et al. 2020<br>Vernyik et al. 2020 |
| Biofilm production    |                 |                |              |                                                                               | Biofilm                                                                                                                                                 |                                           |                                                                               |
| Oxacillin resistance  | R3              | V6             | -            | -                                                                             | Beta-lactam resistance                                                                                                                                  | Mutation:<br><i>recU</i> ,<br><i>femB</i> | -                                                                             |
| Biofilm production    | R4              | V1, V2, V4, V5 | 46           | Capsule polysaccharide                                                        | Pathway capsule polysaccharide biosynthesis,<br>Biofilm                                                                                                 | Deletion                                  | Takeuchi et al. 2005                                                          |
| Cefoxitin resistance  |                 |                |              | Choline/carnitine/betaine transporter                                         | Transmembrane transporter activity,<br>Beta-lactam resistance,<br>Oxidoreductase,<br>betaine-aldehyde dehydrogenase activity,<br>Beta-lactam resistance |                                           |                                                                               |
| -                     | R5              | V1, V2, V4     | -            | -                                                                             | -                                                                                                                                                       | -                                         | -                                                                             |

407

408

## 409 Discussion

410 In the present study we have gained a deeper understanding of the mechanism of chromosomal and  
 411 phenotypic diversity in *S. haemolyticus* within a cell population by analyzing a nosocomial strain  
 412 belonging to the most prevalent *S. haemolyticus* clonal type. This strain was analyzed for genetic and  
 413 phenotypic stability after serial passages *in vitro* in the presence and absence of a physiological stress,  
 414 using whole genome sequencing, phylogenetic and pan-genome analysis.

415 In our previous study (Bouchami et al. 2016), we found that the *Sma*I PFGE macrorestriction patterns  
 416 of the invasive *S. haemolyticus* strain HSM742 were highly unstable during serial growth *in vitro* in  
 417 optimal growth conditions. In this study, by sequencing five individual colonies from seven time points  
 418 (n=35), we found that the variability generated during serial growth in the absence of antibiotic was due  
 419 to the existence of subpopulations of genomic variants deriving from the same ancestral strain. This was

420 supported by the low number of SNPs found when the core genome of the 35 colonies was compared.  
421 Although the genomes of all colonies were highly related, we observed six different structural genomic  
422 variants (V1-V6) which included deletions of different fragments sizes, all located in the *oriC* environ  
423 right to the origin of replication. This chromosomal region was previously shown by others to be highly  
424 variable (Takeuchi et al. 2005). Moreover, colonies' genomes suffered small deletions and non-  
425 synonymous mutations in genes located in regions of the chromosome outside the *oriC* region. The  
426 deletions observed were most of the times associated to insertion sequences that were either within the  
427 deletion fragment or in its extremity, suggesting they might be involved in the deletion process. However,  
428 recombination, previously shown to be frequent in *S. haemolyticus* (Bouchami et al. 2016), and mutation  
429 events might be also contributing to this diversity.

430 When the SNPs-based phylogenetic tree of the 35 colonies was constructed we found that each of the  
431 six deletion variants were grouped in a specific cluster of the tree, which was different from the cluster  
432 containing colonies without deletions. Every cluster included colonies isolated in different days of the  
433 stability assay and the same variant was detected in different points in time. Additionally, the proportion  
434 of the different genomic variants varied over time. Altogether, these results suggest that deletion variants  
435 were created in the population a limited number of times early during serial growth and were then  
436 maintained in the subsequent generations with their proportions changing overtime. However, when serial  
437 growth was performed in the presence of sub-inhibitory concentrations of oxacillin, specific variants,  
438 namely those corresponding to a large deletion, were selected, as suggested by the analysis of the PFGE  
439 patterns along serial growth in these conditions. These results point towards the existence of sub-  
440 populations of variants as a survival strategy to counteract stress, wherein the most adapted variant will be  
441 the one that will be selected and prevail.

442 In these variants an impressive number of between 71 and 310 genes in the *oriC* region were deleted  
443 when compared to a colony from the starting culture (d0C1). Deleted genes included a plethora of  
444 different functions, namely those encoding carbohydrates, sugar, metal and aminoacid transport and  
445 metabolic systems and metal binding; transcriptional regulators; virulence-related genes; mismatch repair;  
446 and restriction/modification systems. We also observed the occurrence of deletion of additional genes

447 outside the *oriC*, such as: insertion sequences (transposases) and phages (prophages); peptide transport;  
448 translation machinery; DNA replication; virulence, growth and survival; methicillin and penicillin  
449 resistance; quorum sensing; biofilm production; response to osmotic, oxidative and acidic stress and cold  
450 shock; and cell viability and hemolysis. Furthermore, when strains were compared by SNPs analysis, non-  
451 synonymous mutations in relevant genes were additionally detected. Moreover, we were able to  
452 demonstrate that the gene deletions and mutations detected were frequently paralleled by changes in  
453 clinically relevant phenotypes such as biofilm formation, beta-lactams resistance, mannitol fermentation  
454 and hemolysis.

455 Altogether, deletions in *oriC* region and outside *oriC* represent near a quarter of the *S. haemolyticus*  
456 chromosome and can constitute a mechanism of genome reduction by which bacteria would gain fitness  
457 (Kuley et al. 2017; Vernyik et al. 2020). On the other hand, it could be a mechanism for specialization of  
458 *S. haemolyticus* to survive in a specific niche as seen previously for other bacterial species (Georgiades  
459 and Raoult 2011; Kuley et al. 2017; Rolain et al. 2013). Although the different deletion variants lost  
460 distinctive functions, the maintenance of several different deletion variants in the same cell population, as  
461 the one observed in our study, guarantees that the entire gene library is present in the population at all  
462 time points. The existence of such a genetic diversity, would allow that the most adapted variant would  
463 emerge from the population, when faced with a new environmental challenge. This was the case when the  
464 strain under study was grown in the presence of oxacillin, wherein the most beta-lactam resistant variant  
465 (V1 and V2, MIC >256 µg/mL) was selected.

466 Although the study described here was totally performed *in vitro*, a recent study by Both *et al.*  
467 detected the presence of *S. epidermidis* deletion variants during prosthetic joint infections (PJI) (Both et  
468 al. 2021), suggesting that the mechanism described here for *S. haemolyticus* could actually occur *in vivo*  
469 and be a common strategy of coagulase-negative staphylococci to circumvent host immune defenses and  
470 stresses imposed by hospital environment.

471 Overall, our results suggest that *S. haemolyticus* populations are composed of subpopulations of  
472 genetic variants that might be affected in their growth, gene expression level, stress resistance, specific  
473 metabolic processes and virulence. The high genetic and phenotypic variability observed in the most

474 epidemic *S. haemolyticus* clonal type appears to be the result of IS dependent and also IS independent  
475 events such as recombination and mutation events. The maintenance of subpopulations of cells in  
476 different physiological states might be a strategy to adapt rapidly to environmental stresses imposed by  
477 host or hospital environment.

478

## 479 **Methods**

480 **Bacterial strains.** The *S. haemolyticus* HSM742 strain used in this work was isolated from the blood  
481 culture of a 56-year-old male patient at a hospital in Portugal in 2010. The strain belonged to the most  
482 epidemic (most frequent and widely disseminated) *S. haemolyticus* clonal type (ST1, CC29) (Bouchami et  
483 al. 2016)[9]. Strains *S. haemolyticus* JCSC1435 and *S. haemolyticus* Sh29/312/L2 were used as references  
484 for WGS, the methicillin-resistant *S. aureus* (MRSA) strain WIS was used as a control for stability assays  
485 and *S. aureus* ATCC 29213 from the American Type Culture Collection (ATCC) was used as a control  
486 for antimicrobial susceptibility testing.

487 **Assessment of genomic stability *in vitro*.** *S. haemolyticus* strain HSM742 was subjected to serial  
488 passages on tryptic soy broth (TSB). A single colony was transferred to Tryptic Soy Broth (TSB) (Difco,  
489 Detroit, USA) and grown 24 hours at 37°C. Cultures were daily transferred to fresh liquid medium (1:100  
490 dilution) for 34 days (Bouchami et al. 2016)[9]. To assess for genomic stability, the same set of  
491 experiments was carried out under antibiotic pressure using TSB supplemented with sub-inhibitory  
492 concentrations of oxacillin (MIC/4) (Oxoid, Basingstoke, UK). MRSA isolate WIS was used as an  
493 internal control for the stability assay. Serially grown populations were characterized by PFGE (Chung et  
494 al. 2000).

495 **Evaluation of phenotypic stability *in vitro*.** Serially grown populations or colonies were tested for  
496 oxacillin and cefoxitin minimum inhibitory concentrations (MICs), hemolysis halo, mannitol  
497 fermentation and biofilm production.

498 Oxacillin and cefoxitin MICs were determined using E-tests (AB BioMérieux, Solna, Sweden) according  
499 to CLSI recommendations (CLSI 2014). Hemolysis was tested by spotting 5 µl drops of an overnight  
500 bacterial culture on the surface of blood agar plates for 48h at 37°C (Boerlin et al. 2003). Mannitol

501 fermentation was tested by inoculation of isolates onto mannitol salt agar (Becton, Dickinson and  
502 Company, Le Pont de Claix, France) followed by incubation for 24-48h at 37°C. Biofilm formation was  
503 detected by the microtiter plate assay method (Fredheim et al. 2009; Christensen et al. 1985).

504 **Assessment of cell population variability.** To assess variability within the same cell population, five  
505 colonies at seven time points during stability assays (n=35 colonies) were analyzed for phenotypic  
506 features and whole genome sequencing (WGS).

507 Serial dilutions of cultures corresponding to days 0, 13, 16, 22, 25, 28 and 34 were spread over the  
508 surface of TSA agar and incubated overnight at 37°C. Five colonies (~17-100% of the population) were  
509 selected randomly from the plates of the ancestral strain HSM742 (day 0) and from subsequent  
510 generations (days 13, 16, 22, 25, 28 and 34). The half of each colony was used for performing the  
511 phenotypic assays (oxacillin and cefoxitin resistance, hemolysis, mannitol fermentation ability and  
512 biofilm production) and the other half was used for DNA extraction for whole genome sequencing  
513 (WGS).

514 **Whole genome sequencing and *de novo* assembly.** Genomic DNA was isolated from half a colony  
515 using the Qiagen DNeasy Blood & Tissue Kit (Qiagen, Limburg, The Netherlands) and sequenced by  
516 Illumina MiSeq system. Libraries for genome sequencing were constructed using the Nextera XT DNA  
517 sample preparation kit (Illumina) and sequenced using 150 bp pair-end reads with an estimated coverage  
518 of 100x. After trimming, the reads were assembled *de novo* into contigs using the CLC Genomics  
519 Workbench 9.0 (Qiagen, Hilden, Germany) analysis package with default parameters.

520 Additionally, pure and high molecular weight DNA was extracted from overnight culture of d0C1 by a  
521 standard phenol-chloroform extraction protocol (Sambrook and David 2006) and sequenced on a SpotON  
522 flow cell vR9.4.1 using Oxford Nanopore rapid barcoding protocol (Oxford Nanopore Technologies,  
523 ONT, Oxford, UK) MinION. Hybrid assembly using ONT data was done using Unicycler (Wick et al.  
524 2017).

525 **Comparative genomic analysis.** All the resulting contigs from Illumina sequencing were ordered using  
526 the closed genome of *S. haemolyticus* JCSC1435 (NCBI accession number AP006716) as a reference  
527 using Mauve (<http://darlinglab.org/mauve/mauve.html>) (Darling et al. 2010). Automated annotation was

528 performed using the RAST (<http://rast.nmpdr.org/>) and prokka  
529 (<http://www.vicbioinformatics.com/software/prokka.shtml>) softwares (Aziz et al. 2008; Seemann 2014)  
530 using default settings. Genomic comparisons were undertaken using a combination of Mauve (Darling et  
531 al. 2010) and Artemis (<http://www.sanger.ac.uk/science/tools/artemis-comparison-tool-act>) (Carver et al.  
532 2005). All the genomes were visualized with BLAST Ring Image Generator (BRIG)  
533 (<http://brig.sourceforge.net/>) (Alikhan et al. 2011) using blast with 70% and 90% for lower and upper  
534 nucleotide identity thresholds, respectively using both *S. haemolyticus* JCSC1435 and HSM742-doC1  
535 closed genomes as references. To look for presence/absence of genes in all colonies, the pangenome was  
536 constructed using Roary pipeline v3.12 (<https://sanger-pathogens.github.io/Roary/>) (Page et al. 2015).  
537 2015) with default settings.

538 **Core-genome Single Nucleotide Polymorphisms (SNPs) analysis.** SNPs were identified separately  
539 within each strain, using CSI Phylogeny-1.4 (<https://cge.cbs.dtu.dk/services/CSIPhylogeny>, (Kaas et al.  
540 2014)) pipeline, available by the Centre of Genomic Epidemiology (CGE) of the Technical University of  
541 Denmark (DTU). Mapping of the *de novo* assembled contigs against the JCSC1435 reference genome  
542 (GenBank accession number AP006716) (Takeuchi et al. 2005) was carried out using BWA version 0.7.2  
543 (Li and Durbin 2010). Single nucleotide polymorphisms (SNPs) were identified on the basis of the  
544 mpileup files generated by SAMTools v. 0.1.18 (Li et al. 2009). The criteria used for calling SNPs were  
545 as follows: a minimal relative depth at SNP positions of 10%, a minimal Z-score of 1.96, a minimal SNP  
546 quality of 30 and a minimal read mapping quality of 25. The minimum distance between SNPs was  
547 disabled and all indels were excluded. An alignment of the SNPs was then created by concatenating the  
548 SNPs based on position on reference genome.

549 Gubbins software was run using default settings to detect the recombinant regions based on the SNP  
550 density (Croucher et al. 2015). The polymorphic sites resulting from recombination events were first  
551 detected and filtered out and the phylogeny was reconstructed using RAxML. The filtered SNP output  
552 was transformed into SNP distance matrix using the snp-dists v 0.62 ([https://github.com/tseemann/snp-](https://github.com/tseemann/snp-dists)  
553 [dists](https://github.com/tseemann/snp-dists)). A maximum likelihood tree was constructed from concatenated SNPs (from the alignment) and  
554 visualized using MEGA 7 software (Kumar et al. 2016). An estimation of the short-term mutation rate



555 was calculated considering the number of core SNPs between a colony in day 0 with a colony collected at  
556 day 34 that did not suffer deletions.

557

#### 558 **Data access**

559 The whole genome raw sequencing reads data of the 35 isolates analyzed in this study have been  
560 submitted to the Sequence Reads Archives under accession number PRJNA836617.

#### 561 **Competing interest statement**

562 The authors declare no competing interests.

#### 563 **Acknowledgments**

564 The authors thank Dr. José Melo-Cristino of the Instituto de Microbiologia, Instituto de Medicina  
565 Molecular, Faculdade de Medicina, Universidade de Lisboa, Lisbon, Portugal for providing *S.*  
566 *haemolyticus* HSM742 isolate used in this study. A part of this work was presented as an oral  
567 communication at the 12<sup>th</sup> International Meeting on Microbial Epidemiological Markers (IMMEM XII),  
568 Dubrovnik, Croatia, from September 18-21, 2019.

#### 569 **Author Contributions**

570 Conceived and designed the experiments: MM and OB. Performed the experiments: OB. Analyzed the  
571 data: OB MM JC MaM. Contributed reagents/materials/analysis tools: MM, HdL. Wrote the paper: OB,  
572 MM. Revised the manuscript: MM, HdL, JC. All authors reviewed and approved the manuscript.

573

574

575 **References**

- 576 Alikhan N, Petty N, ben Zakour N, Beatson S. 2011. BLAST Ring Image Generator (BRIG): Simple  
577 prokaryote genome comparisons. *BMC Genomics* **12**: 402. doi.org/10.1186/1471-2164-12-402
- 578 Aziz RK, Bartels D, Best A, DeJongh M, Disz T, Edwards RA, Formsma K, Gerdes S, Glass EM, Kubal  
579 M, et al. 2008. The RAST Server: Rapid annotations using subsystems technology. *BMC Genomics*  
580 **9**: 75. doi.org/10.1186/1471-2164-9-75
- 581 Beenken KE, Dunman PM, McAleese F, Macapagal D, Murphy E, Projan SJ, Blevins JS, Smeltzer MS.  
582 2004. Global gene expression in *Staphylococcus aureus* biofilms. *J Bacteriol* **186**: 4665-4684. doi:  
583 10.1128/JB.186.14.4665-4684.2004
- 584 Boerlin P, Kuhnert P, Hüsey D, Schaellibaum M. 2003. Methods for identification of *Staphylococcus*  
585 *aureus* isolates in cases of bovine mastitis. *J Clin Microbiol* **41**: 767-671. doi:  
586 10.1128/JCM.41.2.767-771.2003
- 587 Both A, Huang J, Qi M, Lausmann C, Weißelberg S, Büttner H, Lezius S, Failla AV, Christner M,  
588 Stegger M, et al. 2021. Distinct clonal lineages and within-host diversification shape invasive  
589 *Staphylococcus epidermidis* populations. *PLoS Pathog* **17**: e1009304.  
590 doi.org/10.1371/journal.ppat.1009304
- 591 Bouchami O, de Lencastre H, Miragaia M. 2016. Impact of insertion sequences and recombination on the  
592 population structure of *Staphylococcus haemolyticus*. *PLoS ONE* **11**: e0156653.  
593 doi.org/10.1371/journal.pone.0156653
- 594 Carver TJ, Rutherford KM, Berriman M, Rajandream MA, Barrell BG, Parkhill J. 2005. ACT: The  
595 Artemis comparison tool. *Bioinformatics* **21**: 3422-3423. doi: 10.1093/bioinformatics/bti553
- 596 Cavanagh JP, Klingenberg C, Hanssen AM, Fredheim EA, Francois P, Schrenzel J, Flaegstad T, Sollid  
597 JE. 2012. Core genome conservation of *Staphylococcus haemolyticus* limits sequence based  
598 population structure analysis. *J Microbiol Methods* **89**: 159–166. doi: 10.1016/j.mimet.2012.03.014

- 599 Chandler M, Mahillon J. 2002. Insertion Sequences Revisited. In *Mobile DNA*, 2nd ed. (eds. Nancy L.  
600 Craig, Robert Cragie, Martin Gellert, and Alan M. Lambowitz). American Society for Microbiology  
601 Press, Washington, D.C.
- 602 Christensen GD, Simpson WA, Younger JJ, Baddour LM, Barrett FF, Melton DM, Beachey EH. 1985.  
603 Adherence of coagulase-negative staphylococci to plastic tissue culture plates: A quantitative model  
604 for the adherence of staphylococci to medical devices. *J Clin Microbiol* **22**: 996-1006.  
605 doi: 10.1128/jcm.22.6.996-1006.1985
- 606 Chung M, de Lencastre H, Matthews P, Tomasz A, Adamsson I, de Sousa M, Camou T, Cocuzza C,  
607 Corso A, Couto I, et al. 2000. Molecular typing of methicillin-resistant *Staphylococcus aureus* by  
608 pulsed-field gel electrophoresis: Comparison of results obtained in a multilaboratory effort using  
609 identical protocols and MRSA strains. *Microb Drug Resist* **6**: 189-198. doi: 10.1089/mdr.2000.6.189
- 610 CLSI. 2014. Clinical and Laboratory Standards Institute. 2014. Performance Standards for Antimicrobial  
611 Susceptibility Testing; Twenty-Fourth informational supplement. CLSI document M100-S24.
- 612 Croucher NJ, Page AJ, Connor TR, Delaney AJ, Keane JA, Bentley SD, Parkhill J, Harris SR. 2015.  
613 Rapid phylogenetic analysis of large samples of recombinant bacterial whole genome sequences  
614 using Gubbins. *Nucleic Acids Res* **43**: e15. doi: 10.1093/nar/gku1196
- 615 Darling A, Mau B, Perna N. 2010. Progressive mauve: Multiple genome alignment with gene gain, loss  
616 and rearrangement. *PLoS ONE* **5**: e11147. doi.org/10.1371/journal.pone.0011147
- 617 Fredheim EG, Klingenberg C, Rohde H, Frankenberger S, Gaustad P, Flaegstad T, Sollid JE. 2009.  
618 Biofilm formation by *Staphylococcus haemolyticus*. *J Clin Microbiol* **47**: 1172–  
619 1180. doi: 10.1128/JCM.01891-08
- 620 Georgiades K, Raoult D. 2011. Genomes of the most dangerous epidemic bacteria have a virulence  
621 repertoire characterized by fewer genes but more toxin-antitoxin modules. *PLoS ONE* **6**: e17962.  
622 doi.org/10.1371/journal.pone.0017962
- 623 Gill SR, Fouts DE, Archer GL, Mongodin EF, DeBoy RT, Ravel J, Paulsen IT, Kolonay JF, Brinkac L,  
624 Beanan M, et al. 2005. Insights on evolution of virulence and resistance from the complete genome  
625 analysis of an early methicillin-resistant *Staphylococcus aureus* strain and a biofilm-producing

- 626 methicillin-resistant *Staphylococcus epidermidis* strain. *J Bacteriol* **187**: 2426-2438. doi:  
627 10.1128/JB.187.7.2426-2438.2005
- 628 Graf AC, Leonard A, Schäuble M, Rieckmann LM, Hoyer J, Maass S, Lalk M, Becher D, Pané-Farré J,  
629 Riedel K. 2019. Virulence factors produced by *Staphylococcus aureus* biofilms have a moonlighting  
630 function contributing to biofilm integrity. *Mol Cell Proteomics* **18**: 1036-1053. doi:  
631 10.1074/mcp.RA118.001120
- 632 Hira V, Kornelisse RF, Sluijter M, Kamerbeek A, Goessens WHF, de Groot R, Hermans PWM. 2013.  
633 Colonization dynamics of antibiotic-resistant coagulase-negative staphylococci in neonates. *J Clin*  
634 *Microbiol* **51**: 595-597. doi: 10.1128/JCM.02935-12
- 635 Hübscher J, Jansen A, Kotte O, Schäfer J, Majcherczyk PA, Harris LG, Bierbaum G, Heinemann M,  
636 Berger-Bächli B. 2007. Living with an imperfect cell wall: Compensation of *femAB* inactivation in  
637 *Staphylococcus aureus*. *BMC Genomics* **8**: 307. doi: 10.1186/1471-2164-8-307
- 638 Ito T, Katayama Y, Asada K, Mori N, Tsutsumimoto K, Tiensasitorn C, Hiramatsu K. 2001. Structural  
639 comparison of three types of staphylococcal cassette chromosome *mec* integrated in the  
640 chromosome in methicillin-resistant *Staphylococcus aureus*. *Antimicrob Agents Chemother* **45**:  
641 1323-1336. doi: 10.1128/AAC.45.5.1323-1336.2001
- 642 Joseph Sambrook and David W Russell. 2006. Purification of nucleic acids by extraction with  
643 phenol:chloroform. *CSH Protoc* **1**: pdb.prot4455. doi: 10.1101/pdb.prot4455
- 644 Kaas RS, Leekitcharoenphon P, Aarestrup FM, Lund O. 2014. Solving the problem of comparing whole  
645 bacterial genomes across different sequencing platforms. *PLoS ONE* **9**: e104984. doi:  
646 10.1371/journal.pone.0104984.
- 647 Keaton MA, Rosato RR, Plata KB, Singh CR, Rosato AE. 2013. Exposure of Clinical MRSA  
648 Heterogeneous Strains to  $\beta$ -Lactams Redirects Metabolism to Optimize Energy Production through  
649 the TCA Cycle. *PLoS ONE* **8**: e71025. doi.org/10.1371/journal.pone.0071025
- 650 Kuley R, Kuijt E, Smits MA, Roest HIJ, Smith HE, Bossers A. 2017. Genome plasticity and  
651 polymorphisms in critical genes correlate with increased virulence of Dutch outbreak-related  
652 *Coxiella burnetii* strains. *Front Microbiol* **8**: 1526. doi: 10.3389/fmicb.2017.01526

- 653 Kumar S, Stecher G, Tamura K. 2016. MEGA7: Molecular Evolutionary Genetics Analysis Version 7.0  
654 for Bigger Datasets. *Mol Biol Evol* **33**: 1870–1874. doi: 10.1093/molbev/msw054
- 655 Li H, Durbin R. 2010. Fast and accurate long-read alignment with Burrows-Wheeler transform.  
656 *Bioinformatics* **26**: 589–595. doi: 10.1093/bioinformatics/btp698
- 657 Li H, Handsaker B, Wysoker A, Fennell T, Ruan J, Homer N, Marth G, Abecasis G, Durbin R, Genome  
658 Project Data Processing S. 2009. The Sequence Alignment/Map format and SAMtools.  
659 *Bioinformatics* **25**: 2078–2079. doi: 10.1093/bioinformatics/btp352
- 660 Page AJ, Cummins CA, Hunt M, Wong VK, Reuter S, Holden MTG, Fookes M, Falush D, Keane JA,  
661 Parkhill J. 2015. Roary: Rapid large-scale prokaryote pan genome analysis. *Bioinformatics* **31**:  
662 3691-3693. doi: 10.1093/bioinformatics/btv421
- 663 Pain M, Hjerde E, Klingenberg C, Cavanagh JP. 2019. Comparative Genomic Analysis of *Staphylococcus*  
664 *haemolyticus* reveals key to hospital adaptation and pathogenicity. *Front Microbiol* **10**: 2096. doi:  
665 10.3389/fmicb.2019.02096
- 666 Prunier AL, Leclercq R. 2005. Role of *mutS* and *mutL* genes in hypermutability and recombination in  
667 *Staphylococcus aureus*. *J Bacteriol* **187**: 3455-3464. doi: 10.1128/JB.187.10.3455-3464.2005
- 668 Rolain JM, Vayssier-Taussat M, Saisongkroh W, Merhej V, Gimenez G, Robert C, le Rhun D, Dehio C,  
669 Raoult D. 2013. Partial disruption of translational and posttranslational machinery reshapes growth  
670 rates of *Bartonella birtlesii*. *mBio* **4**: e00115-13. doi: 10.1128/mBio.00115-13
- 671 Schneider D, Lenski RE. 2004. Dynamics of insertion sequence elements during experimental evolution  
672 of bacteria. *Res Microbiol* **155**: 319–327. doi: 10.1016/j.resmic.2003.12.008
- 673 Seemann T. 2014. Prokka: Rapid prokaryotic genome annotation. *Bioinformatics* **30**: 2068-2069. doi:  
674 10.1093/bioinformatics/btu153
- 675 Sinha AK, Possoz C, Leach DRF. 2020. The roles of bacterial DNA double-strand break repair proteins  
676 in chromosomal DNA replication. *FEMS Microbiol Rev* **44**: 351-368.  
677 doi.org/10.1093/femsre/fuaa009
- 678 Takeuchi F, Watanabe S, Baba T, Yuzawa H, Ito T, Morimoto Y, Kuroda M, Cui L, Takahashi M, Ankai  
679 A, et al. 2005. Whole-genome sequencing of *Staphylococcus haemolyticus* uncovers the extreme

- 680 plasticity of its genome and the evolution of human-colonizing staphylococcal species. *J Bacteriol*  
681 **187**: 7292–7308. doi: 10.1128/JB.187.21.7292-7308.2005
- 682 Vernyik V, Karcagi I, Tímár E, Nagy I, Györkei Á, Papp B, Györfy Z, Pósfai G. 2020. Exploring the  
683 fitness benefits of genome reduction in *Escherichia coli* by a selection-driven approach. *Sci Rep* **10**:  
684 7345. doi.org/10.1038/s41598-020-64074-5
- 685 Watanabe S, Ito T, Morimoto Y, Takeuchi F, Hiramatsu K. 2007. Precise excision and self-integration of  
686 a composite transposon as a model for spontaneous large-scale chromosome inversion/deletion of  
687 the *Staphylococcus haemolyticus* clinical strain JCSC1435. *J Bacteriol* **189**: 2921-2925.  
688 doi: 10.1128/JB.01485-06
- 689 Wick RR, Judd LM, Gorrie CL, Holt KE. 2017. Unicycler: Resolving bacterial genome assemblies from  
690 short and long sequencing reads. *PLoS Comput Biol* **13**: e1005595.  
691 doi.org/10.1371/journal.pcbi.1005595
- 692 Wu X, Santos RR, Fink-Gremmels J. 2015. Cadmium Modulates Biofilm Formation by *Staphylococcus*  
693 *epidermidis*. *Int J Environ Res Public Health* **12**: 2878-2894. doi: 10.3390/ijerph120302878
- 694 Zhang Z, Saier MH. 2012. Transposon-mediated adaptive and directed mutations and their potential  
695 evolutionary benefits. *J Mol Microbiol Biotechnol* **21**: 59-70. doi: 10.1159/000333108
- 696 Zhou X, Kang F, Qu X, Fu H, Alvarez PJJ, Tao S, Zhu D. 2020. Role of extracellular polymeric  
697 substances in microbial reduction of arsenate to arsenite by *Escherichia coli* and *Bacillus subtilis*.  
698 *Environ Sci Technol* **54**: 6185-6193. doi: 10.1021/acs.est.0c01186
- 699  
700  
701  
702  
703  
704  
705  
706
